# Supplementary material
Source: PubMed Central journal article supplement (PMC6497573)

**Figure S1.**

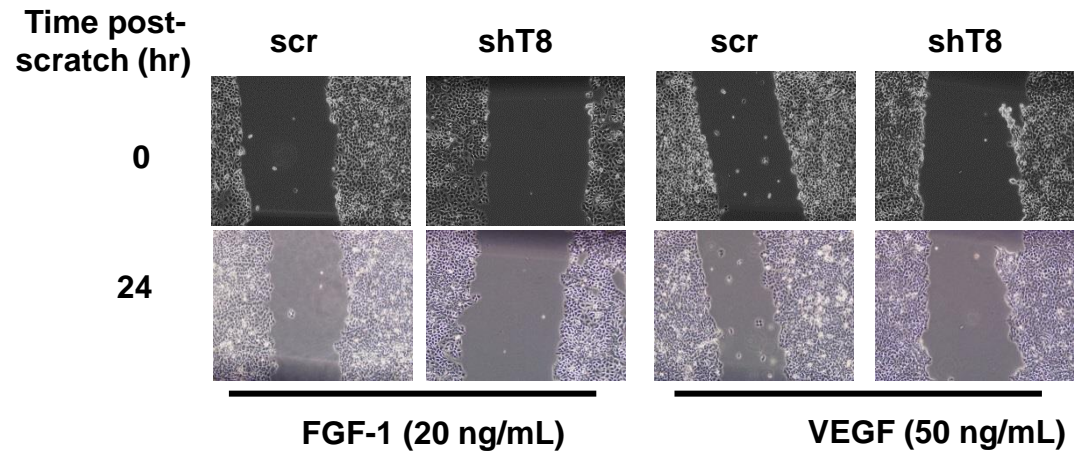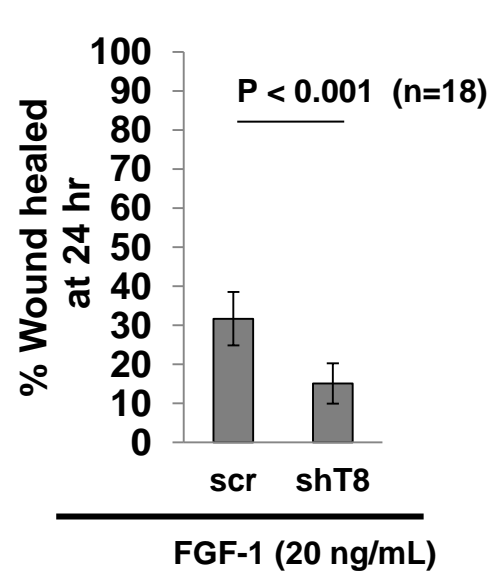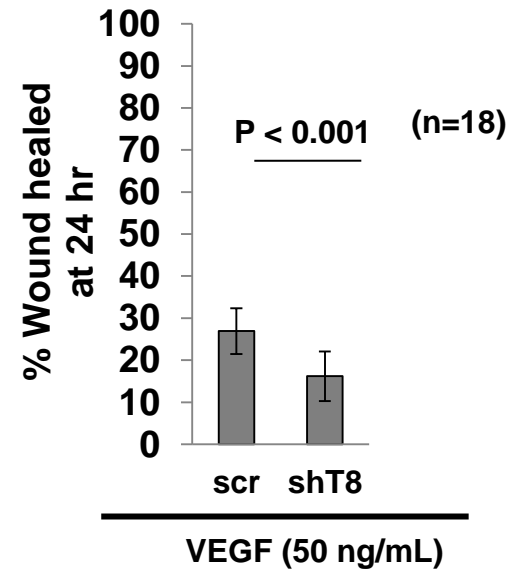

Supplement: NIHMS1518807-supplement-2.pdf [file NIHMS1518807-supplement-2.pdf]

Figure S2.

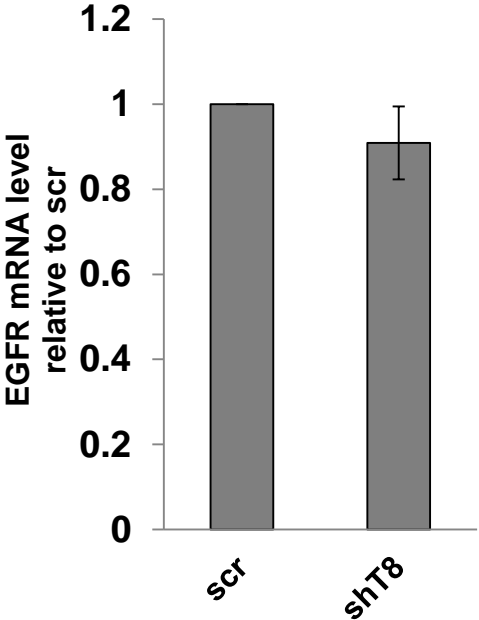

Supplement: NIHMS1518807-supplement-3.pdf [file NIHMS1518807-supplement-3.pdf]

**Figure S3.**

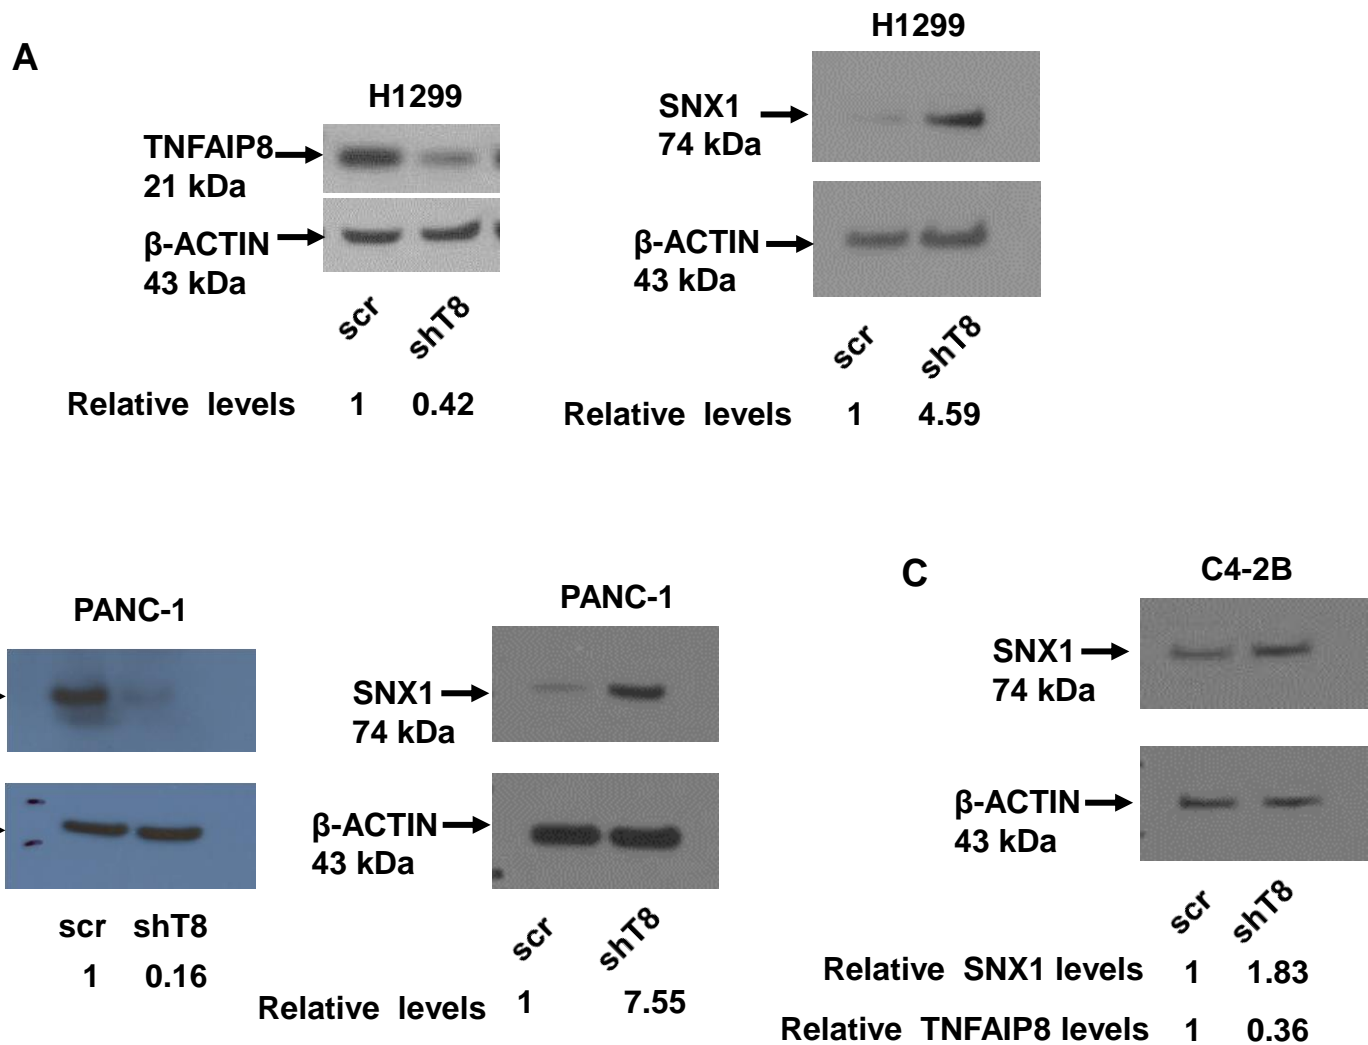

Supplement: NIHMS1518807-supplement-4.pdf [file NIHMS1518807-supplement-4.pdf]

**Figure S4A.**

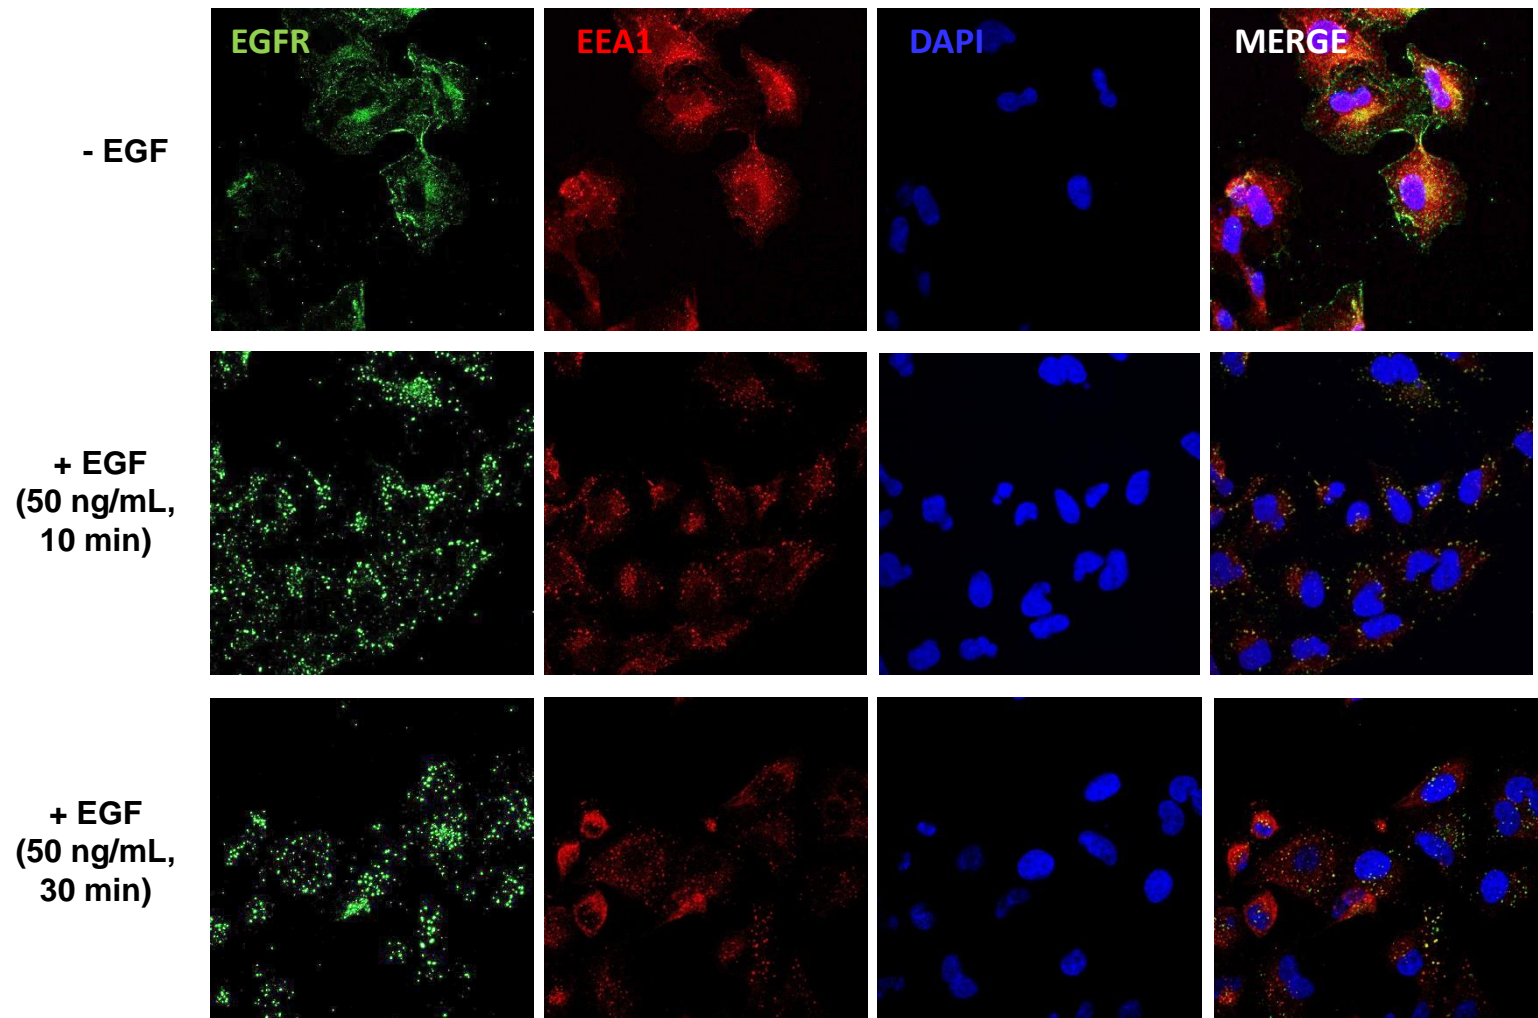

**Figure S4B.**

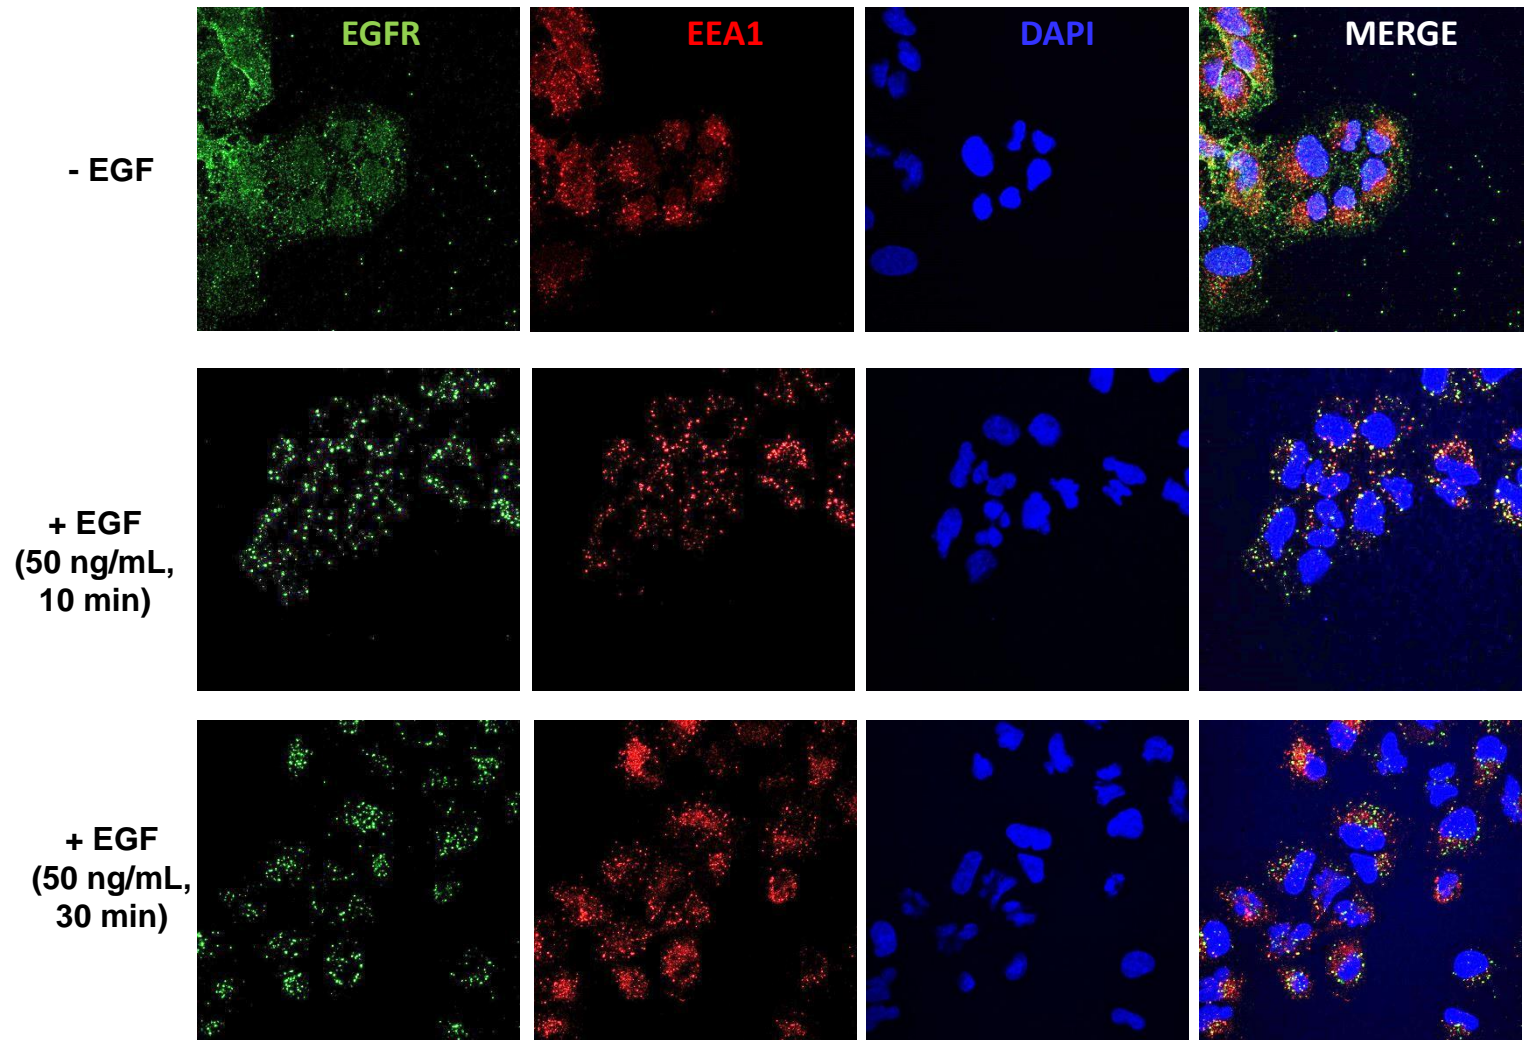

Supplement: NIHMS1518807-supplement-5.pdf [file NIHMS1518807-supplement-5.pdf]

**Figure S5A.**

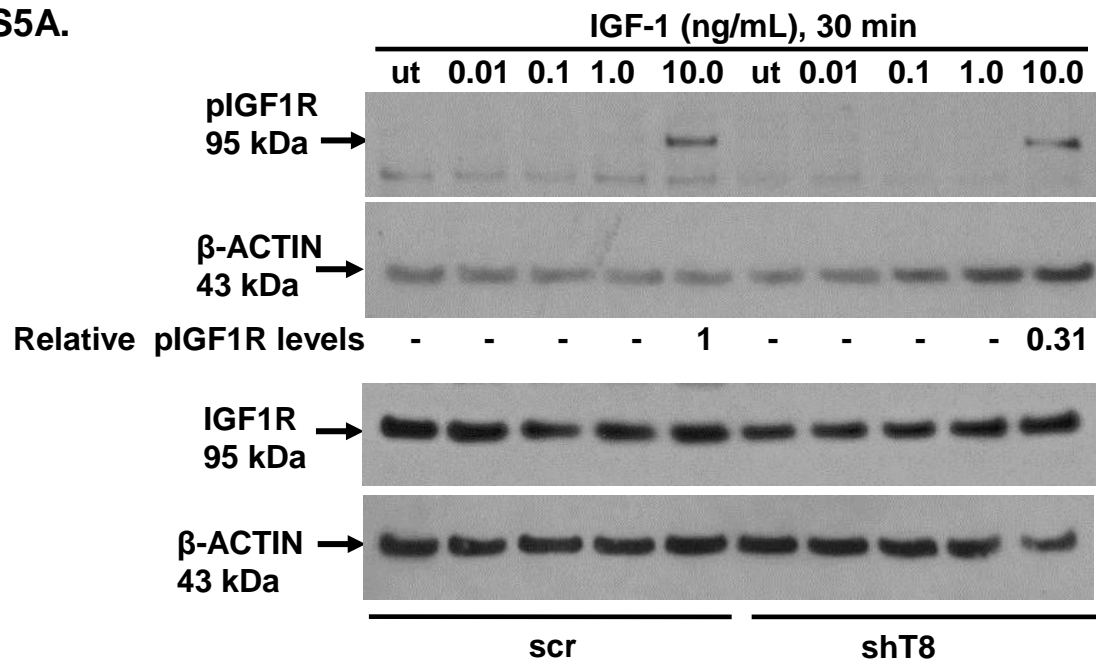

**Figure S5B.**

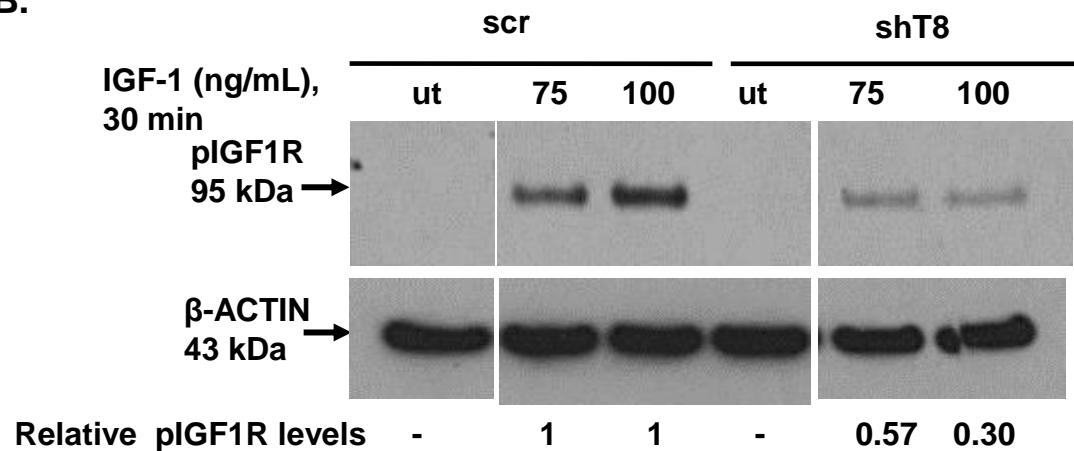

Supplement: NIHMS1518807-supplement-6.pdf [file NIHMS1518807-supplement-6.pdf]

Figure S6.

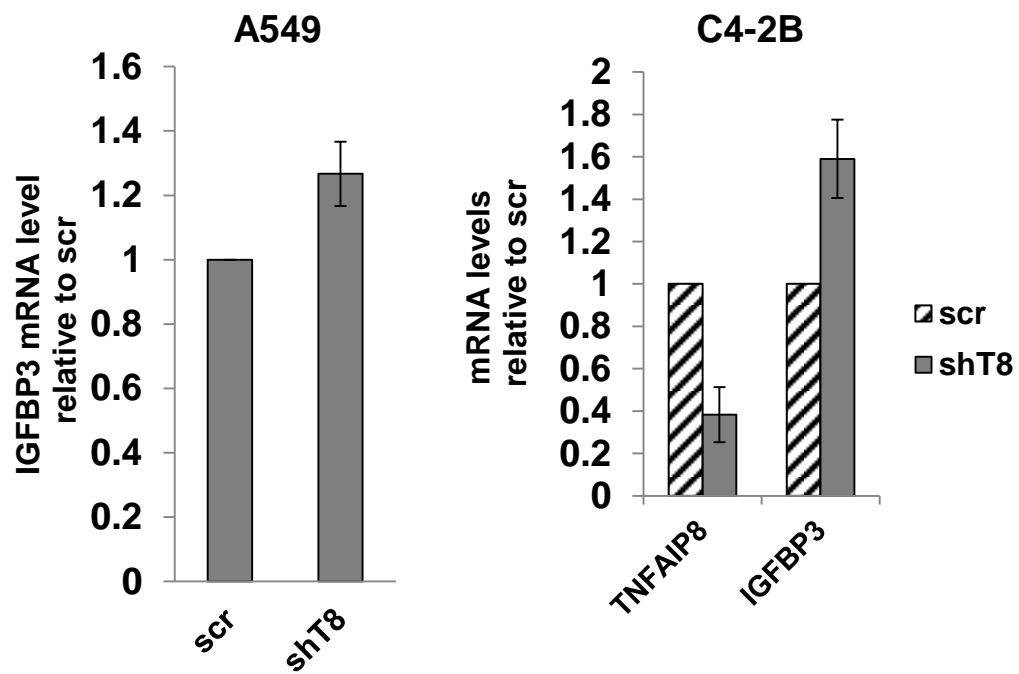

Supplement: NIHMS1518807-supplement-7.pdf [file NIHMS1518807-supplement-7.pdf]

Figure S7.

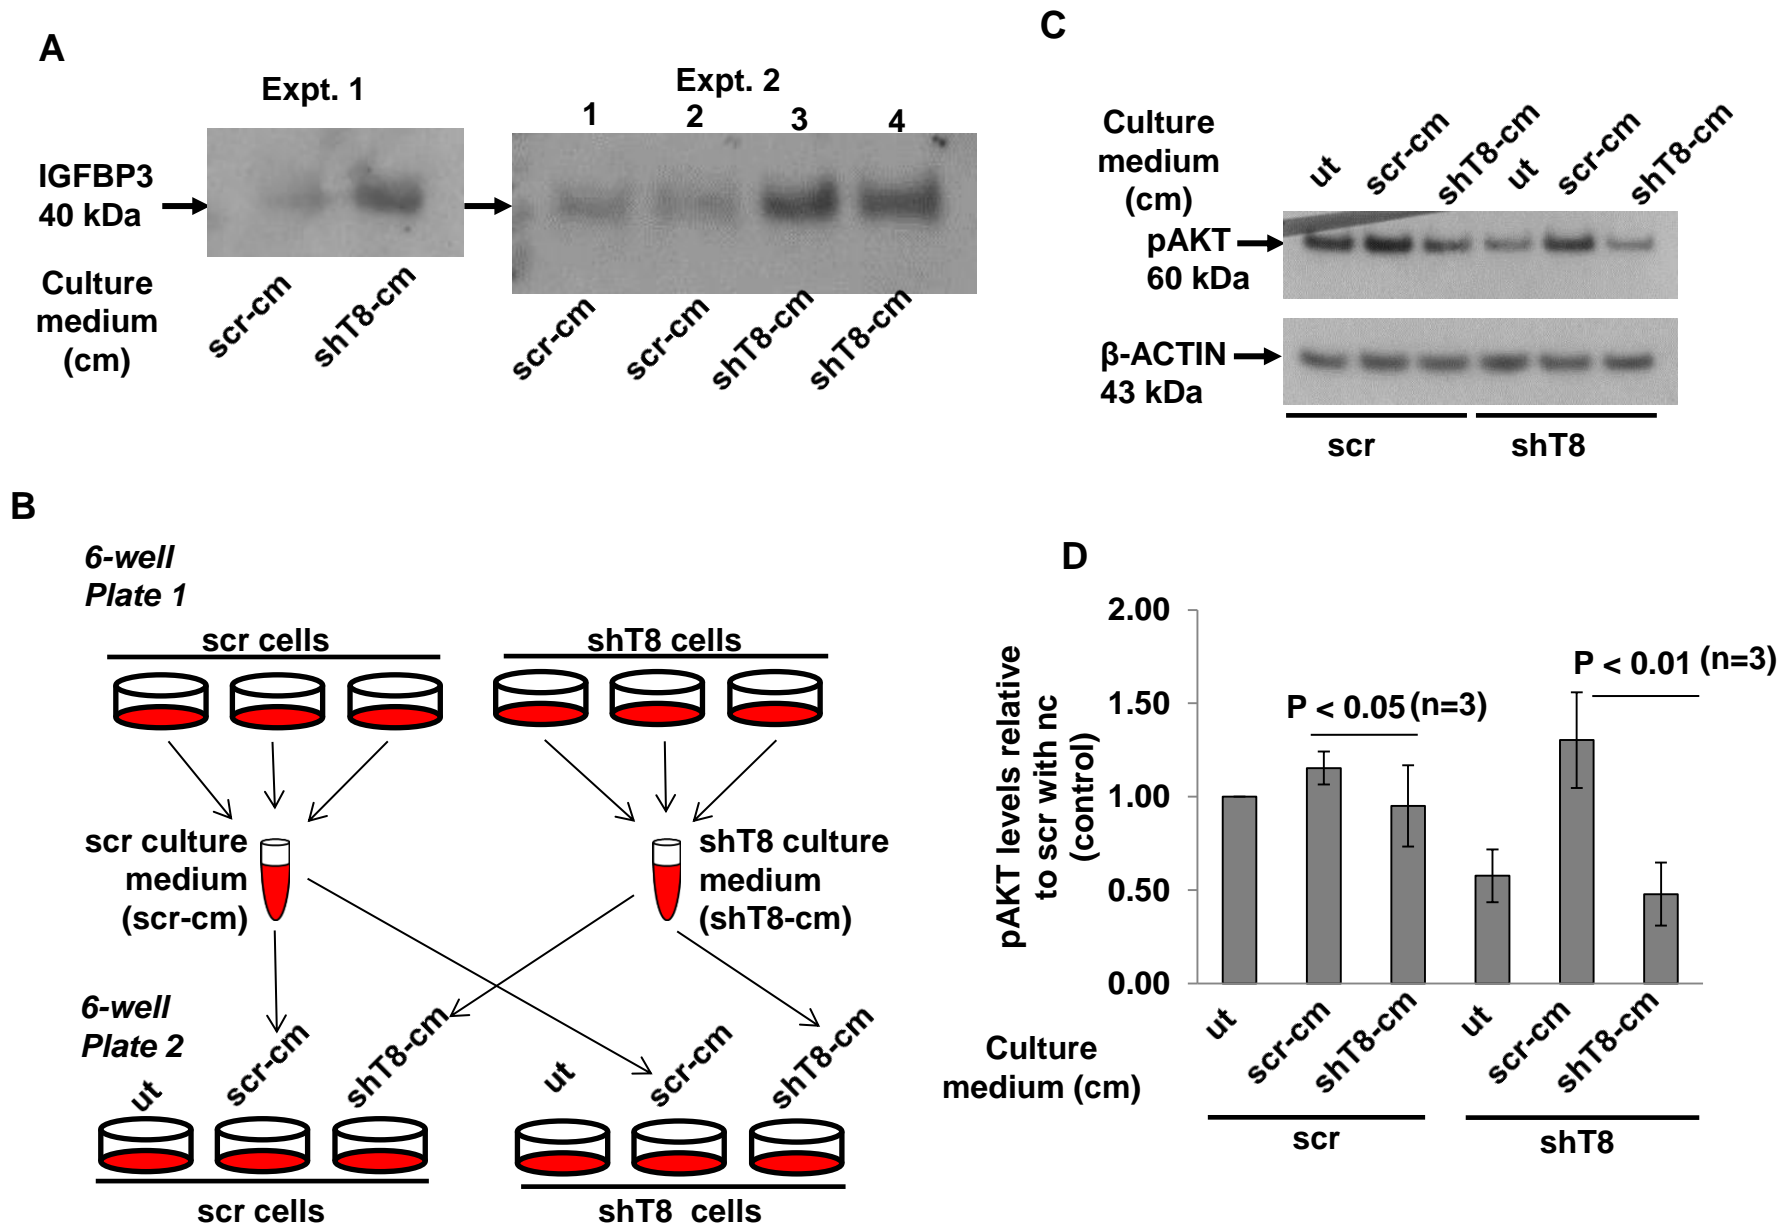

Supplement: NIHMS1518807-supplement-8.pdf [file NIHMS1518807-supplement-8.pdf]
